# Supplementary material for: Genome Mining and Gene Expression Reveal Maytansine Biosynthetic Genes from Endophytic Communities Living inside Gymnosporia heterophylla (Eckl. and Zeyh.) Loes. and the Relationship with the Plant Biosynthetic Gene, Friedelin Synthase
Source: MDPI journal article supplement (doi:10.3390/plants11030321), 2022-01-25
Supplement: s1 [file s1]

## Supplementary file

### Table of contents

**Figure S1.** Multiple alignments of amplified AHBA synthase gene obtained from leaves stems, and roots of *G. heterophylla* originated from South Africa from 2017 and 2018 collections.

**Figure S2.** Multiple amino acid alignments of the translated AHBA synthase gene obtained from leaves stems, and roots of *G. heterophylla* originated from South Africa and the reference AHBA synthase enzyme encoded by the rifK gene from *Amycolatopsis mediterranei*.

**Figure S3.** Multiple alignments of amplified rcbL gene obtained from leaves stems, and roots of *G. heterophylla* originated from South Africa from 2017 and 2018 collections compared to the authentic *G. heterophylla* cultivated in our laboratory, Germany.

**Figure S4.** Multiple alignments of amplified matK gene obtained from leaves stems, and roots of *G. heterophylla* originated from South Africa from 2017 and 2018 collections compared to the authentic *G. heterophylla* cultivated in our laboratory, Germany.

**Table S1.** Overview of the halogenase gene received from *A. mirum* (our reference) and presented in the roots of *G. heterophylla* collected from South Africa.

**Table S2.** Obtained halogenase gene sequences from *A. mirum* (our reference), and the roots of *G. heterophylla* collected from South Africa,

**Table S3.** Statistic analysis of the AHBA synthase gene expression of *G. heterophylla* collected from South Africa in 2017 and 2018 and cultivated at our laboratory in Germany,

**Table S4.** Statistic analysis of the FRS gene expression of *G. heterophylla* collected from South Africa in 2017 and 2018 and cultivated at our laboratory in Germany.

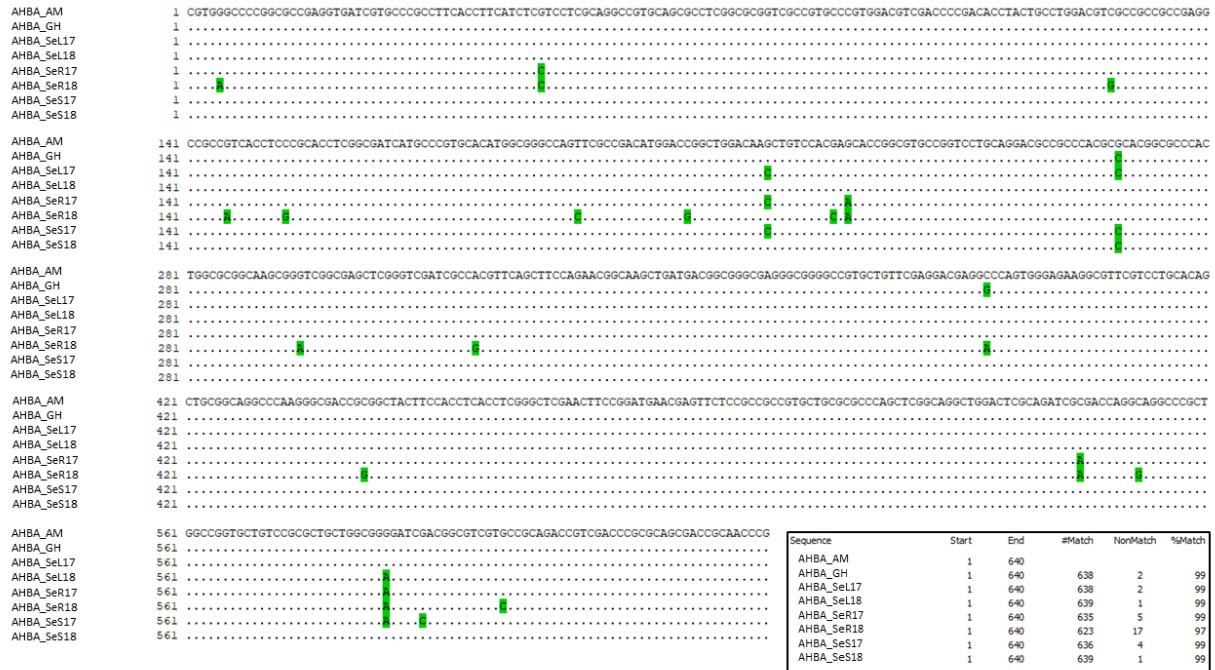

**Figure S1.** A multiple alignments of amplified AHBA synthase gene obtained from leaves stems, and roots of *G. heterophylla* originated from South Africa from 2017 and 2018 collections using global alignment from Clone Manager 9 Professional edition. The green highlighted indicates non-matching nucleotides, while the dot indicates the identical nucleotide. Am = *Actinosynnema mirum* (DMS 43827), the microbial reference. QH = *G. heterophylla* cultivating in our laboratory. SeL17 = leaves of *G. heterophylla* from 2017 collection. SeS17 = stems of *G. heterophylla* from 2017 collection. SeR17 = roots of *G. heterophylla* from 2017 collection. SeL18 = leaves of *G. heterophylla* from 2018 collection. SeS18 = stems of *G. heterophylla* from 2018 collection. SeR18 = roots of *G. heterophylla* from 2018 collection.

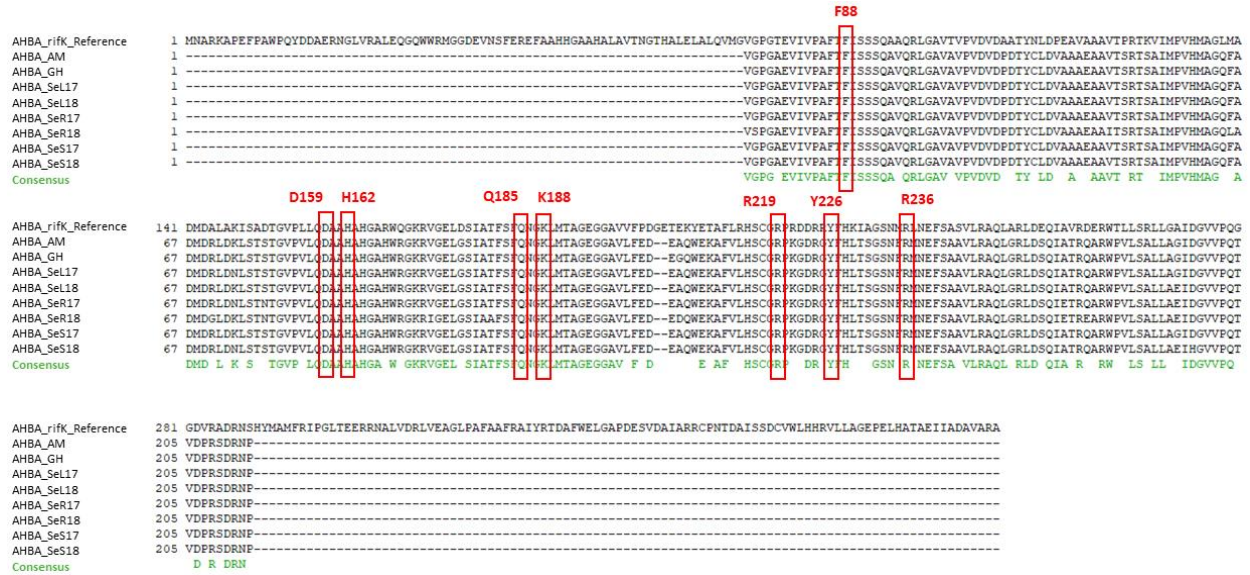

**Figure S2.** Multiple amino acid alignments of the translated AHBA synthase gene obtained from leaves stems, and roots of *G. heterophylla* originated from South Africa and the reference AHBA synthase enzyme encoded by the rifK gene from *Amycolatopsis mediterranei*. The highlighted amino acids in red and boxes indicate conserved active residues of the AHBA synthase enzyme from *A. mediterranei*.

```

rcbl_GH      1 CAGAGACTAAAGCGAGTGTGGATTCAAGGCTGGCGTTAAAGATTATAAATTGACTTATTATCTCTGACTATGAAACCAAGATACTGATATCTTGGCAGCATTCCGAGTAACCTCAACCTGGAGTTCGGCTGAA
rcbl_SeL17   1 .....
rcbl_SeL18   1 .....
rcbl_SeR17   1 .....
rcbl_SeR18   1 .....
rcbl_SeS17   1 .....
rcbl_SeS18   1 .....

rcbl_GH      141 GAAGCAGGGGCGCGGTAGCTGCTGAATCTTCTACTGTTACATGGACAACCTGTGTGGACCGATGGGCTTACCAGTCTTGATCGTTACAAAGGACGATGCTACCCATCGAGCCCGTGTGTGGAGAAGAAATCAATTAT
rcbl_SeL17   141 .....
rcbl_SeL18   141 .....
rcbl_SeR17   141 .....
rcbl_SeR18   141 .....
rcbl_SeS17   141 .....
rcbl_SeS18   141 .....

rcbl_GH      281 TGCTTATGTAGCTTATCCTTTAGACCTTTTCGAAGAAGGTTCTGTACTACATGTTTACTTCCATTGTGGGTAATGTCCTTTGGGTTCAAAGCCCTGGCGCTCTACGCTCTGGAGGATTGGGAATCCCCCTGCTTAT
rcbl_SeL17   281 .....
rcbl_SeL18   281 .....
rcbl_SeR17   281 .....
rcbl_SeR18   281 .....
rcbl_SeS17   281 .....
rcbl_SeS18   281 .....

rcbl_GH      421 CTAAAACTTTCCAAAGGCCGCGCATGTTATCCAAGTTGAGAGAGATAAATTGAACAAGTATGGACGCCCTCTATTGGGGTGACTATTAAACCTAAATTGGGATTATCCGCTAAGAATTATGTTAGAGCAGTTTATGAA
rcbl_SeL17   421 .....
rcbl_SeL18   421 .....
rcbl_SeR17   421 .....
rcbl_SeR18   421 .....
rcbl_SeS17   421 .....
rcbl_SeS18   421 .....

rcbl_GH      561 TGTCCTCG
rcbl_SeL17   561 .....
rcbl_SeL18   561 .....
rcbl_SeR17   561 .....
rcbl_SeR18   561 .....
rcbl_SeS17   561 .....
rcbl_SeS18   561 .....

```

**Figure S3.** A multiple alignments of amplified rcbL gene obtained from leaves stems, and roots of *G. heterophylla* originated from South Africa from 2017 and 2018 collections using global alignment from Clone Manager 9 Professional edition. The dot indicates the identical nucleotide. QH = *G. heterophylla* cultivating in our laboratory, the authentic material. SeL17 = leaves of *G. heterophylla* from 2017 collection. SeS17 = stems of *G. heterophylla* from 2017 collection. SeR17 = roots of *G. heterophylla* from 2017 collection. SeL18 = leaves of *G. heterophylla* from 2018 collection. SeS18 = stems of *G. heterophylla* from 2018 collection. SeR18 = roots of *G. heterophylla* from 2018 collection.

```

MatK_GH      1 AGATGTTTCTTTGCAITTTATTACGATTTGTTCTCCATGAGTATTGAGCTTGGAAATAGTCTTCTTACTCCAAAGAAATCCATTACATTTTTCACAAAGTAAATCCAGATTTTCTTGTCTCTATATAATCTTATG
MatK_SeL17   1 .....
MatK_SeL18   1 .....
MatK_SeR17   1 .....
MatK_SeR18   1 .....
MatK_SeS17   1 .....
MatK_SeS18   1 .....

MatK_GH      141 TGTGGATACGAATCTATCTTTCTTTCTACGTAACACAGATTCCTCAITTAGCGTCAACATCCCTCTCGGGTCTCTTGTAGCGAATCCATTCTATGGAATAATAGAACATCTTCAGAGTCTTCTCTAATTATTTT
MatK_SeL17   141 .....
MatK_SeL18   141 .....
MatK_SeR17   141 .....
MatK_SeR18   141 .....
MatK_SeS17   141 .....
MatK_SeS18   141 .....

MatK_GH      281 CAGGTTATCCTTTGGTTGTGAAGGATCCTTGACACATTATGTTAGATATCAAGGAAATTCATTCTGGCTTCAAAAGATATGCCATTTCTGATGAATAAATGGAAATTTTACCTTGTTAATTATGTCATGTCATTT
MatK_SeL17   281 .....
MatK_SeL18   281 .....
MatK_SeR17   281 .....
MatK_SeR18   281 .....
MatK_SeS17   281 .....
MatK_SeS18   281 .....

MatK_GH      421 TTTTGGGGGTATCAACCGGAAGGATCTATATAACCAATTATCCAGCATTCCTCGACTTTTATGGCTATCTTCAAGTGTGGGACTAAATCTTCAGTGGTACGGGATCAATGGTGGCAATGCATTTCTAATAG
MatK_SeL17   421 .....
MatK_SeL18   421 .....
MatK_SeR17   421 .....
MatK_SeR18   421 .....
MatK_SeS17   421 .....
MatK_SeS18   421 .....

MatK_GH      561 ATACGCTATGAGAACTCGATACAGAGTTCACCTTATTTCTTTGATTGGATTATTGGCAAAAGCGAGATTTGTAACTATTAGGACATCCATTAGTAAACGACCCGGGCTGATTCATCGGATTCGGATATTATC
MatK_SeL17   561 .....
MatK_SeL18   561 .....
MatK_SeR17   561 .....
MatK_SeR18   561 .....
MatK_SeS17   561 .....
MatK_SeS18   561 .....

MatK_GH      701 GACCGATTGTGCGTATATGCACAAATCTTTCTCATTATTACAGTGGATCCTCAAAAAAAGAGTTTGTATCGAATAAATATGTAC
MatK_SeL17   701 .....
MatK_SeL18   701 .....
MatK_SeR17   701 .....
MatK_SeR18   701 .....
MatK_SeS17   701 .....
MatK_SeS18   701 .....

```

**Figure S4.** A multiple alignments of amplified matK gene obtained from leaves stems, and roots of *G. heterophylla* originated from South Africa from 2017 and 2018 collections using global alignment from Clone Manager 9 Professional edition. The dot indicates the identical nucleotide. QH = *G. heterophylla* cultivating in our laboratory, the authentic material. SeL17 = leaves of *G. heterophylla* from 2017 collection. SeS17 = stems of *G. heterophylla* from 2017 collection. SeR17 = roots of *G. heterophylla* from 2017 collection. SeL18 = leaves of *G. heterophylla* from 2018 collection. SeS18 = stems of *G. heterophylla* from 2018 collection. SeR18 = roots of *G. heterophylla* from 2018 collection.

**Table S1.** Overview of the halogenase gene received from *A. mirum* (our reference) and presented in the roots of *G. heterophylla* collected from South Africa.

| Name of the samples    | Sequence length (bp) | Accession number | Microorganism                              | GenBank ID | Sequence ID | % homology |
|------------------------|----------------------|------------------|--------------------------------------------|------------|-------------|------------|
| <u>Reference</u>       |                      |                  |                                            |            |             |            |
| Am_Halogenase          | 454                  | OL944594         | <i>Actinosynnema mirum</i> DSM 43827       | ACU37095.1 | CP001630.1  | 100%       |
| <u>2017 collection</u> |                      |                  |                                            |            |             |            |
| 2017-SeR-Halogenase-1  | 449                  | OK754597         | <i>Catenulispora acidiphila</i> DSM 44928  | ACU69473.1 | CP001700.1  | 78%        |
| 2017-SeR-Halogenase-2  | 512                  | OK649330         | <i>Amycolatopsis</i> sp. WAC1375           | AGE12641.1 | JX576190.1  | 85%        |
| 2017-SeR-Halogenase-3  | 462                  | OK649333         | <i>Variovorax</i> sp. PAMC28562            | QNK76028.1 | CP060296.1  | 80%        |
| 2017-SeR-Halogenase-4  | 476                  | OK754598         | <i>Amycolatopsis</i> sp. YIM 10            | QFU88391.1 | CP045480.1  | 81%        |
| 2017-SeR-Halogenase-5  | 494                  | OK649331         | <i>Streptomyces chartreusis</i> ATCC 14922 | QEV72535.1 | CP023689.1  | 78%        |
| <u>2018 collection</u> |                      |                  |                                            |            |             |            |
| 2018-SeR-Halogenase-1  | 456                  | OK754599         | <i>Urbifossiella limnaea</i> ETA A1        | QDU18131.1 | CP036273.1  | 80%        |
| 2018-SeR-Halogenase-2  | 474                  | OK649332         | <i>Amycolatopsis</i> sp. WAC1375           | AGE12641.1 | JX576190.1  | 86%        |
| 2018-SeR-Halogenase-3  | 457                  | OK649335         | <i>Catenulispora acidiphila</i> DSM 44928  | ACU69473.1 | CP001700.1  | 78%        |
| 2018-SeR-Halogenase-4  | 443                  | OK649334         | <i>Variovorax</i> sp. PAMC28562            | QNK76028.1 | CP060296.1  | 80%        |
| 2018-SeR-Halogenase-5  | 456                  | OK649336         | <i>Catenulispora acidiphila</i> DSM 44928  | ACU69473.1 | CP001700.1  | 78%        |
| 2018-SeR-Halogenase-6  | 458                  | OK754600         | <i>Amycolatopsis</i> sp. YIM 10            | QFU88391.1 | CP045480.1  | 82%        |

**Table S2.** Obtained halogenase gene sequences from *A. mirum* (our reference) and the roots of *G. heterophylla* collected from South Africa.

| Name of the samples   | Sequence length (bp) | Accession number | Sequences                                                                                                                                                                                                                                                                                                                                                                                                                                                                                                  |
|-----------------------|----------------------|------------------|------------------------------------------------------------------------------------------------------------------------------------------------------------------------------------------------------------------------------------------------------------------------------------------------------------------------------------------------------------------------------------------------------------------------------------------------------------------------------------------------------------|
| Reference             |                      |                  |                                                                                                                                                                                                                                                                                                                                                                                                                                                                                                            |
| Am_Halogenase         | 454                  | OL944594         | GTGCGGGAGGGCGCGCAGGTCGTCGGGCTGCTGGAGGAGGGCGGCCGGG<br>TGGTGGGCGTGCGCTACCGCGAGGGCGGGGTCGAGCGCGAGGAGCGGGC<br>CCGGTACGTGGTGGACGCCACCGGCCGGGCAGGCGTGGTCGCCAACCGGT<br>TCGGGCTGCGGCGGATGATCGAGGACCTGCGCATGGTGGCGGTGTTCCAC<br>CACCGCGACGGGCTGGACGAGGCGCACAAACCCGGCCACGAGGGCGACA<br>TCCAGGTCGGCAGTCACGCGGACGGGTGGATCTGGGCGATCCCGCTGTCTG<br>GCGGACCGGATCAGCGTGGGCACGGTGATGCACCGCGACCGGCTGCGCG<br>GTCGCACCCCCGCCGAGGCGTTCGCCGAGCACGTCGAGCGGGTGCCAGG<br>ATCAACCAGCGGCTCACCGGCACACGGCGACCTCGGACTTCTGGGTGGA<br>GACCzGACA |
| 2017 collection       |                      |                  |                                                                                                                                                                                                                                                                                                                                                                                                                                                                                                            |
| 2017_SeR_Halogenase_1 | 449                  | OK754597         | TCCTCGACCTGTTGGGCGCCCGCGAAACGGTGGCGAATCACGGCTTCGTG<br>CGCAAGGACGGCGCGTACTTCGAATGGGGCCCGGAGAACTGGGACCTCG<br>ACTTCAACCACCTGACCGGCGCCAACGGCTACAGCTACCAGGTGATCCGC<br>TCCGAGTTCGACCACCTGTTACTCAAACGGGCCGCGGACAACGGCGTCGA<br>TGTCGCGAGGGGGTCAGGGTCGTGGAGCTGACCTTCGACGATGAGCGGC<br>CGGTCGCCGCGCGCTGGGTGGCTACCGGTGACCGGGAAACCGGCGGTACG<br>ATCGAGTTCGACTTCCTGGTCGACGCCTCTGGCCGGGCGGCGTGATGGCC<br>ACCAAGTACCTGCGCAACCGCACCTACCTGGAGGCGTTCAGGAACGTCGG<br>CGTCTGGTCGTACTGGCGGGGGTTACCCCGCTCGACCGCGGTCCGAAG             |

**Table S2.** Obtained halogenase gene sequences from *A. mirum* (our reference) and the roots of *G. heterophylla* collected from South Africa. (continue)

| Name of the samples        | Sequence length (bp) | Accession number | Sequences                                                                                                                                                                                                                                                                                                                                                                                                                                                                                                                                                                |
|----------------------------|----------------------|------------------|--------------------------------------------------------------------------------------------------------------------------------------------------------------------------------------------------------------------------------------------------------------------------------------------------------------------------------------------------------------------------------------------------------------------------------------------------------------------------------------------------------------------------------------------------------------------------|
| 2017 collection (continue) |                      |                  |                                                                                                                                                                                                                                                                                                                                                                                                                                                                                                                                                                          |
| 2017_SeR_Halogenase_2      | 512                  | OK649330         | GCTTTCCCGCGGTACCAGATCGGGGAGTCGTTGCTGCCGTCGACGGTCCAT<br>GGCGTGTGCCGCATGCTCGGCGCCGCGGACGAACTGGCGGAGGCGGGTTT<br>CCCGGTGAAGCGGGGCGGCACGTTCCGCTGGGGCGCTCGTCCGGAGCCGT<br>GGACGTTCTCCTTCTCTGTCTCCCCGAGGATCACGGGTCCGTCGTCTCGC<br>CTATCAGGTGGAACGGGCGCGGTTTCGACCAGATCTTGCTGAACAACGCCA<br>AGCGCAAGGGTGTGGTGGTGCGGGAGGGGAGCACGGTCACCGGTGCGCT<br>GGAGGAGGGTGAGCGTGTTACGGGTTTGCGTTACGCCGATCCCGACGGTA<br>ACCAGCACGAGGTGTCCGCGACTTTCGTGATCGACGCGTCGGGCAACAAG<br>AGTCGTCTGTACTCCAATGTCGGTGGCTCGCGGAACTATTCGGAGTTCTTC<br>CGCAGCTTGGCGCTGTTTCGGCTACTTCGAGGGCGGCAAGCGGCTGGCCGC<br>TCCGTACTC |
| 2017_SeR_Halogenase_3      | 462                  | OK649333         | GTCGCGCTGTTTCGACAGGCTCGGCGTACGCGACCAGATCGAGCGCATCGG<br>CATGCCCAAGTTTGGCGTCGAATTCGTGTCGCCGGATCACGATCGCGCCGC<br>TTTCGTGCAATTCGCCGAGGCCTGGGACAAGTCGATGCCCTATGCCTGGCA<br>GGTGCGACGCTCCGAAATGGACGAGATCCTCTTTCGCAACGCCGCGGCGC<br>GGGGCGCGGAGGCCATCGAAGGCTGCCGGGTGCGCGAAGTCAGCTTCGA<br>CGCCGATGGTGCCACGTGCAGGCGGTGCTCGACGATGGAACCCGGCGTC<br>AATGGCGGGCGCGCTTCGTACTCGATGCCTCCGGCCGCGACACCTTCCTGT<br>CGAACAAGCTCAAGGCCAAGCTGAAGAACCCGCGCCACAACAGCTCTGC<br>GCTGTTTCGGCCATTTTCGTGAACGCCGAGCGACTGCCCGGCAAGCTCGAAG<br>GCAACATCACG                                                     |



**Table S2.** Obtained halogenase gene sequences from *A. mirum* (our reference) and the roots of *G. heterophylla* collected from South Africa. (continue)

| Name of the samples        | Sequence length (bp) | Accession number | Sequences                                                                                                                                                                                                                                                                                                                                                                                                                                                                                                                                          |
|----------------------------|----------------------|------------------|----------------------------------------------------------------------------------------------------------------------------------------------------------------------------------------------------------------------------------------------------------------------------------------------------------------------------------------------------------------------------------------------------------------------------------------------------------------------------------------------------------------------------------------------------|
| 2017 collection (continue) |                      |                  |                                                                                                                                                                                                                                                                                                                                                                                                                                                                                                                                                    |
| 2017_SeR_Halogenase_4      | 476                  | OK754598         | GCACGGGATCTGCGCCATGCTCGGCGTCCGGGACGAGGTCGAGCGGGCCG<br>GGTTCGTCCGGAACGGGGCGGCACCTTCAAATGGGGGTCTGAACCCGGAC<br>CCGTGGACGTTTCGCGTTCGCCGCGTCGGAGCGGATGGCGGGGCCGACGTC<br>CTACGCCTACCAGGTCGAGCGCACCCGCTTCGACGCCCTGCTGCTCGACA<br>ACGCCGTGCGGTGCGGCGCCGACGTCCGGCAGGGGCATCGCGTGCTCGGC<br>ACGCTGCGCGACGAGGACGGCCGGATCGCCGGTGCCCGCTACCTCGACGA<br>CGCGGGGCGGGAGGGGCACGCCACCGCGCGGTTTCGTCTGTTGACGCGTCG<br>GGCAACGGCAGCACGCTGCACAACGACATCGGCGGCGCCCGCGAGTACT<br>CACCGCATTCGCGCAACCTGGCGCTGTTTCGGCTACTTCGCGGGCGGCCGCC<br>GGGCACCGGAACCCAACGCGGGCAACA               |
| 2017_SeR_Halogenase_5      | 494                  | OK649331         | CACGGCCTGTGCCGGCTGCTCGGCGTGGCCGACGAGGTGGCCGGCGCCGG<br>GTTACCCCTCAAACGCGGCGGCACGTTCCGCTGGGGCCGTAGCGCAGAGC<br>CCTGGCAGTTCAGCTTCGCCATGTCGCCCCGGGTGCCGGAGCCGATGTCCA<br>CCGCGTTCCAGGTCGAGCGGTCCCGGTTTCGACGAGATCCTGCTGCGCAAC<br>GCCGCCGACAACGGCGTGGTCTCGAGAGGGCAACCGGGTGCGCGCGG<br>TCACCCGGGACGGCACCGGCCGGGTTCGACGGGGTCGAGTACACCGGCCG<br>GGACGGCGTGCGCACACCGTGCGCGCCCGCTACGTGGTGGACGCGTCGG<br>GCAACACCAGCAGGATCCACGGTCAGGTTCGGCGCCAGGGTGCGGTCCGA<br>CTTCTTCGCGACCTCGCGGTGTTTCGGCTACTTCGCCGGCGGTGCCCGGCT<br>GCCGCGACCGCACAGCGGCAACATCTTCTGCGCCACCTTCGACGC |

**Table S2.** Obtained halogenase gene sequences from *A. mirum* (our reference) and the roots of *G. heterophylla* collected from South Africa. (continue)

| Name of the samples   | Sequence length (bp) | Accession number | Sequences                                                                                                                                                                                                                                                                                                                                                                                                                                                                                                                         |
|-----------------------|----------------------|------------------|-----------------------------------------------------------------------------------------------------------------------------------------------------------------------------------------------------------------------------------------------------------------------------------------------------------------------------------------------------------------------------------------------------------------------------------------------------------------------------------------------------------------------------------|
| 2018 collection       |                      |                  |                                                                                                                                                                                                                                                                                                                                                                                                                                                                                                                                   |
| 2018_SeR_Halogenase_1 | 456                  | OK754599         | AGCGGCTCGGCATGCTCGACAAGATGAAGGGGAGCCACTTCGTCAAGAA<br>GTACAGCGTCCAGTTCGTCAACCAGCACGGCAGGCTGTCCGAGCCGTTCT<br>ATTTCCTCGACCACCGGCCGCACGAGTCGTGCGAGACGTGGCAGGTCAAG<br>CGCGAGGAGCTTGACGTGGCGCTGCTCGACAACGCCCCGCGAGCACGGCGC<br>CGAGGTGCATGAAGGCGTGCGCGTCCTGAACGTGCTGTTTCGAGGGGGACC<br>GGGCCGTGCGCGTCCGCATCCAGGACGAGGCGGGGGCCGAGCGGGAGGT<br>GCGGGCGAAGGTCATCGTGGACGCGAGCGGGCAGGGGTCGTGATCATG<br>AGCCGGCTCGGCCTGCGCGAGTGGGACCCGGTCCTCAAGAAGGCCGCCCT<br>GTGGACGTACTGGGAGGGCGCCTACCGCGACACCGGCAAGGACGAGGGG<br>GCGACGCTCG                     |
| 2018_SeR_Halogenase_2 | 474                  | OK649332         | CATGGCGTGTGCCGCATGCTCGGCGCCGCGGACGAACTGGCGGAGGCGGG<br>TTTCCCGGTGAAGCGGGGCGGCACGTTCCGCTGGGGCGCTCGTCCGGAGC<br>CGTGGACGTTCTCCTTCTGTCTCCCCGAGGATCACGGGTCCGTGCTCGTT<br>CGCCTATCAGGTGGAACGGGCGCGGTTTCGACCAGATCTTGCTGAACAACG<br>CCAAGCGCAAGGGTGTGGTGGTGCGGGAGGGGAGCACGGTACCCGGTGC<br>GCTGGAGGAGGGTGAGCGTGTTACGGGTTTTCGTTACGCCGATCCCGACG<br>GTAACCAGCACGAGGTGTCCGCGACTTTCGTGATCGACGCGTCGGGCAAC<br>AAGAGTCGTCTGTACTCCAATGTTCGGTGGCTCGCGGAACTATTTCGGAGTTC<br>TTCCGCAGCTTGGCGCTGTTTCGGCTACTTCGAGGGGCGGCAAGCGGCTGGCC<br>GCTCCGTACTCGGGGAACATC |

**Table S2.** Obtained halogenase gene sequences from *A. mirum* (our reference) and the roots of *G. heterophylla* collected from South Africa. (continue)

| Name of the samples        | Sequence length (bp) | Accession number | Sequences                                                                                                                                                                                                                                                                                                                                                                                                                                                                                                    |
|----------------------------|----------------------|------------------|--------------------------------------------------------------------------------------------------------------------------------------------------------------------------------------------------------------------------------------------------------------------------------------------------------------------------------------------------------------------------------------------------------------------------------------------------------------------------------------------------------------|
| 2018 collection (continue) |                      |                  |                                                                                                                                                                                                                                                                                                                                                                                                                                                                                                              |
| 2018_SeR_Halogenase_3      | 457                  | OK649335         | CCTCGACCTGTTGGGCACCCGCGAAACGGTGGCGAATCACGGCTTCGTGC<br>GCAAGGACGGCGCGTACTTCGAATGGGGCCCGGAGAACTGGGACCTCGA<br>CTTCAACCACCTGACCGGCGCCAACGGCTACAGCTACCAGGTGATCCGCT<br>CCGAGTTCGACCACCTGTTACTCAAACAGGCCGCGGACAACGGCGTCGAT<br>GTCCGCGAGGGGGTCAGGGTCGTGGAGCTGACCTTCGACGATGAGCGGCC<br>GGTCGCCGCGCGCTGGGTGACTACCGGTGACCGGGAAACCGGCGGTACGA<br>TCGAGTTCGACTTCCTGGTCGACGCCTCTGGCCGGGCGGCGTGATGGCCA<br>CCAAGTACCTGCGCAACCGCACCTACCTGGAGGCGTTCAGGAACGTCGGC<br>GTCTGGTCGTACTGGCGGGGGGTTACCCCGCTCGACCGCGGTCCGAAGGG<br>CGCCATC |
| 2018_SeR_Halogenase_4      | 443                  | OK649334         | GTTCGACAGGCTCGGCGTACGCGACCAGATCGAGCGCATCGGCATGCCCA<br>AGTTCGGCGTCGAATTCGTGTCGCCGGATCACGATCACGCCGCTTTCGTCTG<br>AATTCGCCGAGGCCTGGGACAAGTCGATGCCCTATGCCTGGCAGGTGCGA<br>CGCTCCGAAATGGATGAGATCCTTTTTTCGCAACGCCGCGGCGCGGGGCGC<br>GGAGGCCATCGAAGGCTGCCGGGTGCGCGAAGTCAGCTTCGACGCCGACG<br>GTGCCCACGTGCAGGCGGTGCTCGACGATGGAACCCGGCGTCAATGGCGG<br>GCGCGCTTCGTACTCGATGCCCCCGGCCGCGACACCTTCCTGTCTGAACAAG<br>CTCAAGGCCAAGCTGAAGAACCCGCGCCACAACAGCTCTGCGCTGTTTCGG<br>CCATTCGTGAACGCCGAGCGACTGCCCCGCAAGCTCGAAG               |

**Table S2.** Obtained halogenase gene sequences from *A. mirum* (our reference) and the roots of *G. heterophylla* collected from South Africa. (continue)

| Name of the samples        | Sequence length (bp) | Accession number | Sequences                                                                                                                                                                                                                                                                                                                                                                                                                                                                                                        |
|----------------------------|----------------------|------------------|------------------------------------------------------------------------------------------------------------------------------------------------------------------------------------------------------------------------------------------------------------------------------------------------------------------------------------------------------------------------------------------------------------------------------------------------------------------------------------------------------------------|
| 2018 collection (continue) |                      |                  |                                                                                                                                                                                                                                                                                                                                                                                                                                                                                                                  |
| 2018_SeR_Halogenase_5      | 456                  | OK649336         | ATCCTCGACCTGTTGGGCGCCCGCGAAACGGTGGCGAATCACGGCTTCGT<br>GCGCAAGGACGGCGCGTACTTCGAATGGGGCCCGGAGAACTGGGACCTC<br>GACTTCAACCACCTGACCGGCGCCAACGGCTACAGCTACCAGGTGATCCG<br>CTCCGAGTTCGACCACCTGTTACTCAAACAGGCCGCGGACAACGGCGTCG<br>ATGTCCGCGAGGGGGTCTGGGTCTGTGGAGCTGACCTTCGACGATGAGCGG<br>CCGGTCGCCGCGCGCTGGGTGGCTACCGGTGACCGGGAAACCGGCGGTAC<br>GATCGAGTTCGACTTCCTGGTCGACGCCTCTGGCCGGGGCCGGCGTGATGGC<br>CACCAAGTACCTGCGCAACCGCACCTACCTGGAGGCGTTCAGGAACGTCTG<br>GCGTCTGGTCGTACTGGCGGGGGGTACCCTGCTCGACCGCGGTCCGAAG<br>GGCGCC   |
| 2018_SeR_Halogenase_6      | 458                  | OK754600         | GCACGGGATCTGCGCCATGCTCGGCGTCCGGGACGAGGTCGAGCGGGCCG<br>GGTTCGTCCGGAACGGGGCGGCACCTTCAAATGGGGGTCTGAACCCGGAC<br>CCGTGGACGTTTCGCGTTCGCCGCGTCGGAGCGGATGGCGGGGCGGACGTC<br>CTACGCCTACCAGGTCGAGCGCACCCGCTTCGACGCCCTGCTGCTCGACA<br>ACGCCGTGCGGTGCGGCGCCGACGTCCGGCAGGGGCATCGCGTGCTCGGC<br>ACGCTGCGCGACGAGGACGGCCGGATCGCCGGTGCCCGCTACCTCGACGA<br>CGCGGGGCGGGAGGGGCACGCCACCGCGCGGTTCGTCTGTGGACGCGTCG<br>GGCAACGGCAGCACGCTGCACAACGACATCGGCGGCGCCCGCGAGTACT<br>CACCGCATTCCCGCAACCTGGCGCTGTTTCGGCTACTTCGCGGGCGGCGCCG<br>GGCACCGG |

**Table S3.** Statistic analysis of the AHBA synthase gene expression of *G. heterophylla* collected from South Africa in 2017 and 2018 and cultivated at our laboratory in Germany.

|          |                 | 2017-SeL | 2017-SeS | 2017-SeR | 2018-SeL | 2018-SeS | 2018-SeR | GH-Lab   |
|----------|-----------------|----------|----------|----------|----------|----------|----------|----------|
| 2017-SeL | Mean difference | —        | -0.0278  | 0.0102   | 0.01313  | 0.01437  | 0.00537  | -0.02963 |
|          | <i>p</i> -value | —        | 0.083    | 0.004    | 0.004    | 0.002    | 0.867    | 0.131    |
| 2017-SeS | Mean difference |          | —        | 0.0380   | 0.04093  | 0.04217  | 0.03317  | -0.00183 |
|          | <i>p</i> -value |          | —        | 0.044    | 0.041    | 0.038    | 0.041    | 1.000    |
| 2017-SeR | Mean difference |          |          | —        | 0.00293  | 0.00417  | -0.00483 | -0.03983 |
|          | <i>p</i> -value |          |          | —        | 0.194    | 0.080    | 0.904    | 0.074    |
| 2018-SeL | Mean difference |          |          |          | —        | 0.00123  | -0.00777 | -0.04277 |
|          | <i>p</i> -value |          |          |          | —        | 0.333    | 0.674    | 0.068    |
| 2018-SeS | Mean difference |          |          |          |          | —        | -0.00900 | -0.04400 |
|          | <i>p</i> -value |          |          |          |          | —        | 0.583    | 0.064    |
| 2018-SeR | Mean difference |          |          |          |          |          | —        | -0.03500 |
|          | <i>p</i> -value |          |          |          |          |          | —        | 0.062    |
| GH-Lab   | Mean difference |          |          |          |          |          |          | —        |
|          | <i>p</i> -value |          |          |          |          |          |          | —        |

One-way ANOVA analysis with Games-Howell Post-Hoc test. GH-Lab indicated *G. heterophylla* cultivated in our laboratory. 2017-SeL, 2017-SeS, and 2017-SeR indicate the leaves, stems, and roots parts of the 2017 collection of *G. heterophylla* originated from Seweweekspoort, South Africa, while 2018-SeL, 2018-SeS, and 2018-SeR indicate the counterpart from the 2018 collection

**Table S4.** Statistic analysis of the FRS gene expression of *G. heterophylla* collected from South Africa in 2017 and 2018 and cultivated at our laboratory in Germany.

|          |                 | 2017-SeL | 2017-SeS | 2017-SeR | 2018-SeL | 2018-SeS | 2018-SeR | GH-Lab   |
|----------|-----------------|----------|----------|----------|----------|----------|----------|----------|
| 2017-SeL | Mean difference | —        | 0.105    | 0.00440  | 0.10897  | 0.1513   | -0.0632  | -0.00240 |
|          | <i>p</i> -value | —        | 0.005    | 1.000    | 0.002    | < .001   | 0.247    | 0.999    |
| 2017-SeS | Mean difference |          | —        | -0.10033 | 0.00423  | 0.0466   | -0.1680  | -0.10713 |
|          | <i>p</i> -value |          | —        | 0.042    | 0.992    | 0.011    | 0.041    | < .001   |
| 2017-SeR | Mean difference |          |          | —        | 0.10457  | 0.1469   | -0.0676  | -0.00680 |
|          | <i>p</i> -value |          |          | —        | 0.017    | 0.012    | 0.215    | 0.989    |
| 2018-SeL | Mean difference |          |          |          | —        | 0.0424   | -0.1722  | -0.11137 |
|          | <i>p</i> -value |          |          |          | —        | 0.065    | 0.024    | 0.014    |
| 2018-SeS | Mean difference |          |          |          |          | —        | -0.2146  | -0.15373 |
|          | <i>p</i> -value |          |          |          |          | —        | 0.021    | < .001   |
| 2018-SeR | Mean difference |          |          |          |          |          | —        | 0.06083  |
|          | <i>p</i> -value |          |          |          |          |          | —        | 0.276    |
| GH-Lab   | Mean difference |          |          |          |          |          |          | —        |
|          | <i>p</i> -value |          |          |          |          |          |          | —        |

One-way ANOVA analysis with Games-Howell Post-Hoc test. GH-Lab indicated *G. heterophylla* cultivated in our laboratory. 2017-SeL, 2017-SeS, and 2017-SeR indicate the leaves, stems, and roots parts of the 2017 collection of *G. heterophylla* originated from Seweweekspoort, South Africa, while 2018-SeL, 2018-SeS, and 2018-SeR indicate the counterpart from the 2018 collection
